# Supplementary material
Source: PubMed Central journal article supplement (PMC7989141)
Supplement: DS_10.1177_0022034520967353.pdf [file DS_10.1177_0022034520967353.pdf]

| <b>Taqman primers</b> |               |
|-----------------------|---------------|
| <b>Gene</b>           | <b>Assay</b>  |
| <i>Gapdh</i>          | Mm99999915_g1 |
| <i>Bsp</i>            | Mm01208381_g1 |
| <i>Dmp1</i>           | Mm01208363_m1 |
| <i>Dspp</i>           | Mm00515667_g1 |
| <i>Axin2</i>          | Mm00443610_m1 |

**Appendix Table 1: Primers used for qPCR analysis**

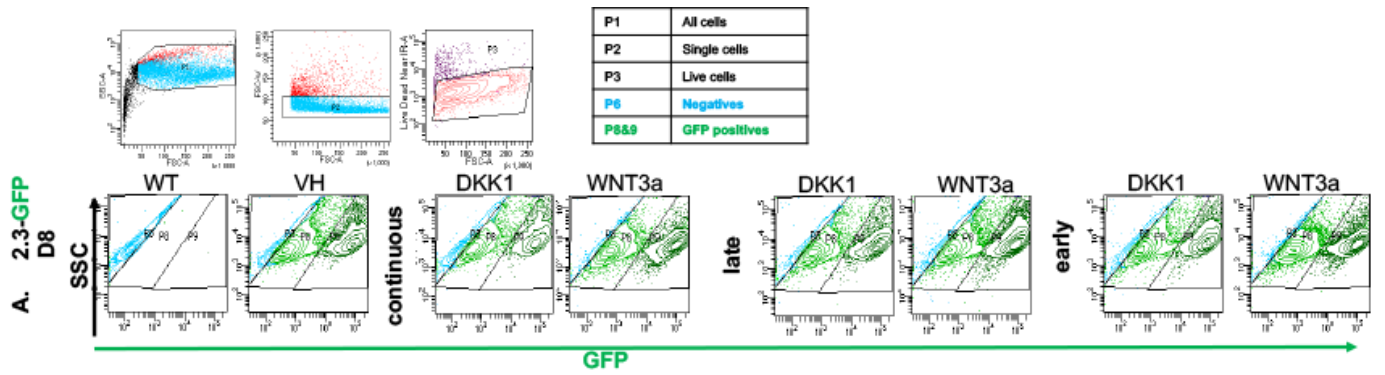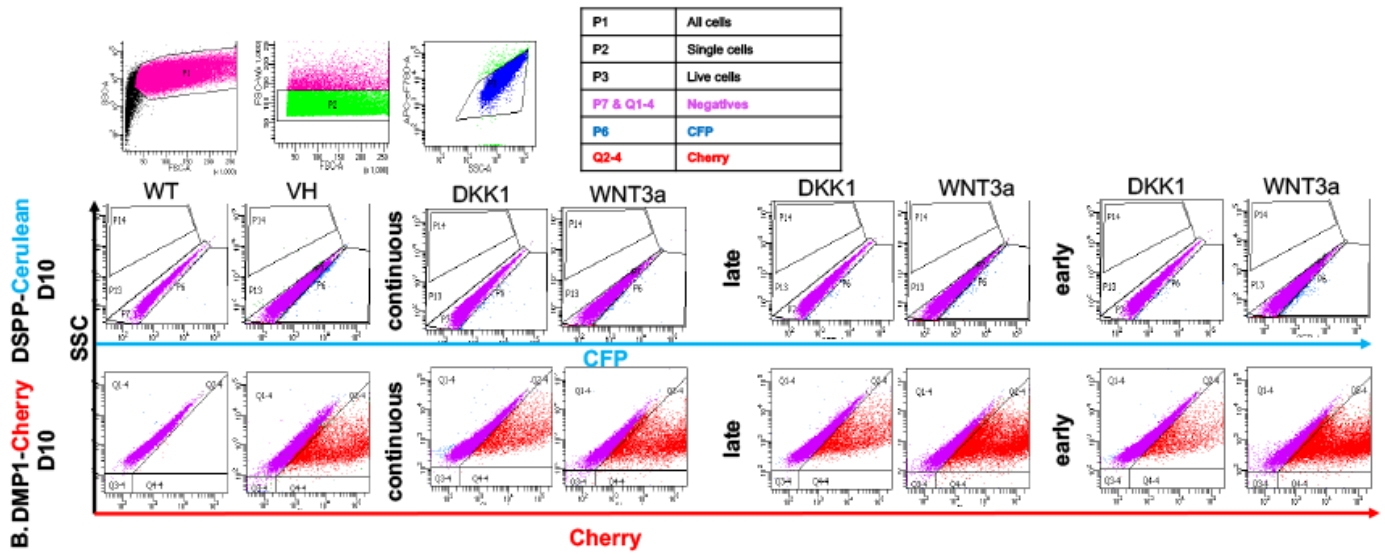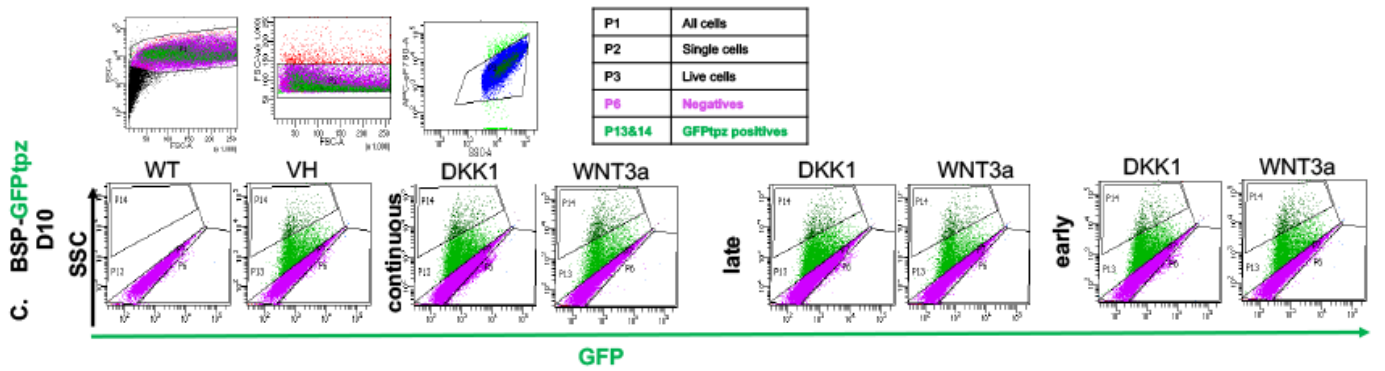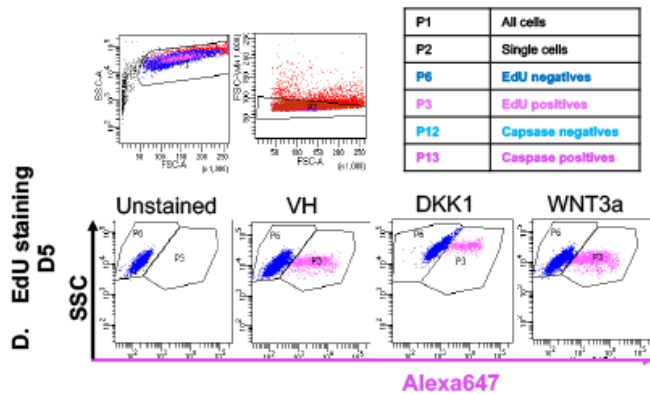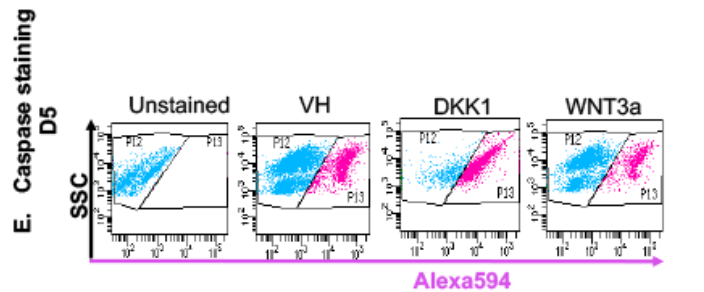

**Appendix Figure 2: Gating strategies for Flow cytometric analysis of dental pulp cultures from various transgenic mice.**

Primary pulp cultures were treated continuously (days 3-10), late (days 7-10), and early (days 3-7) with VH (0.1% BSA), DKK1 (50ng/ml), and WNT3a (50ng/ml), and processed for FACS analysis every 24 hours from days 4-10

Gating strategies used for FACS analysis of cultures derived from 2.3-GFP (A), DSPP-Cerulean/DMP1-Cherry (B), and BSP-GFPtpz (C) transgenic mice, as well as cell cultures processed for EdU staining (D) and cleaved caspase-3 staining (E) as described in Materials and methods.

(A-E) (Top row) Gate P1 includes all cells exclusive of debris. P2 includes the population of single cells, while P3 includes live cells. Dead cells were excluded by staining with Fixable Viability Dye. (Bottom row) FACS analysis performed in 2.3-FP (at day 8), DSPP-Cerulean/DMP1-Cherry (at day 10), BSP-GFPtpz (at day 10), EdU stained and cleaved caspase-3 stained cultures. Non-transgenic and unstained cultures were used as a negative control. Tables show the legends denoting the identity of each gate analyzed by flow cytometry in each corresponding figure.

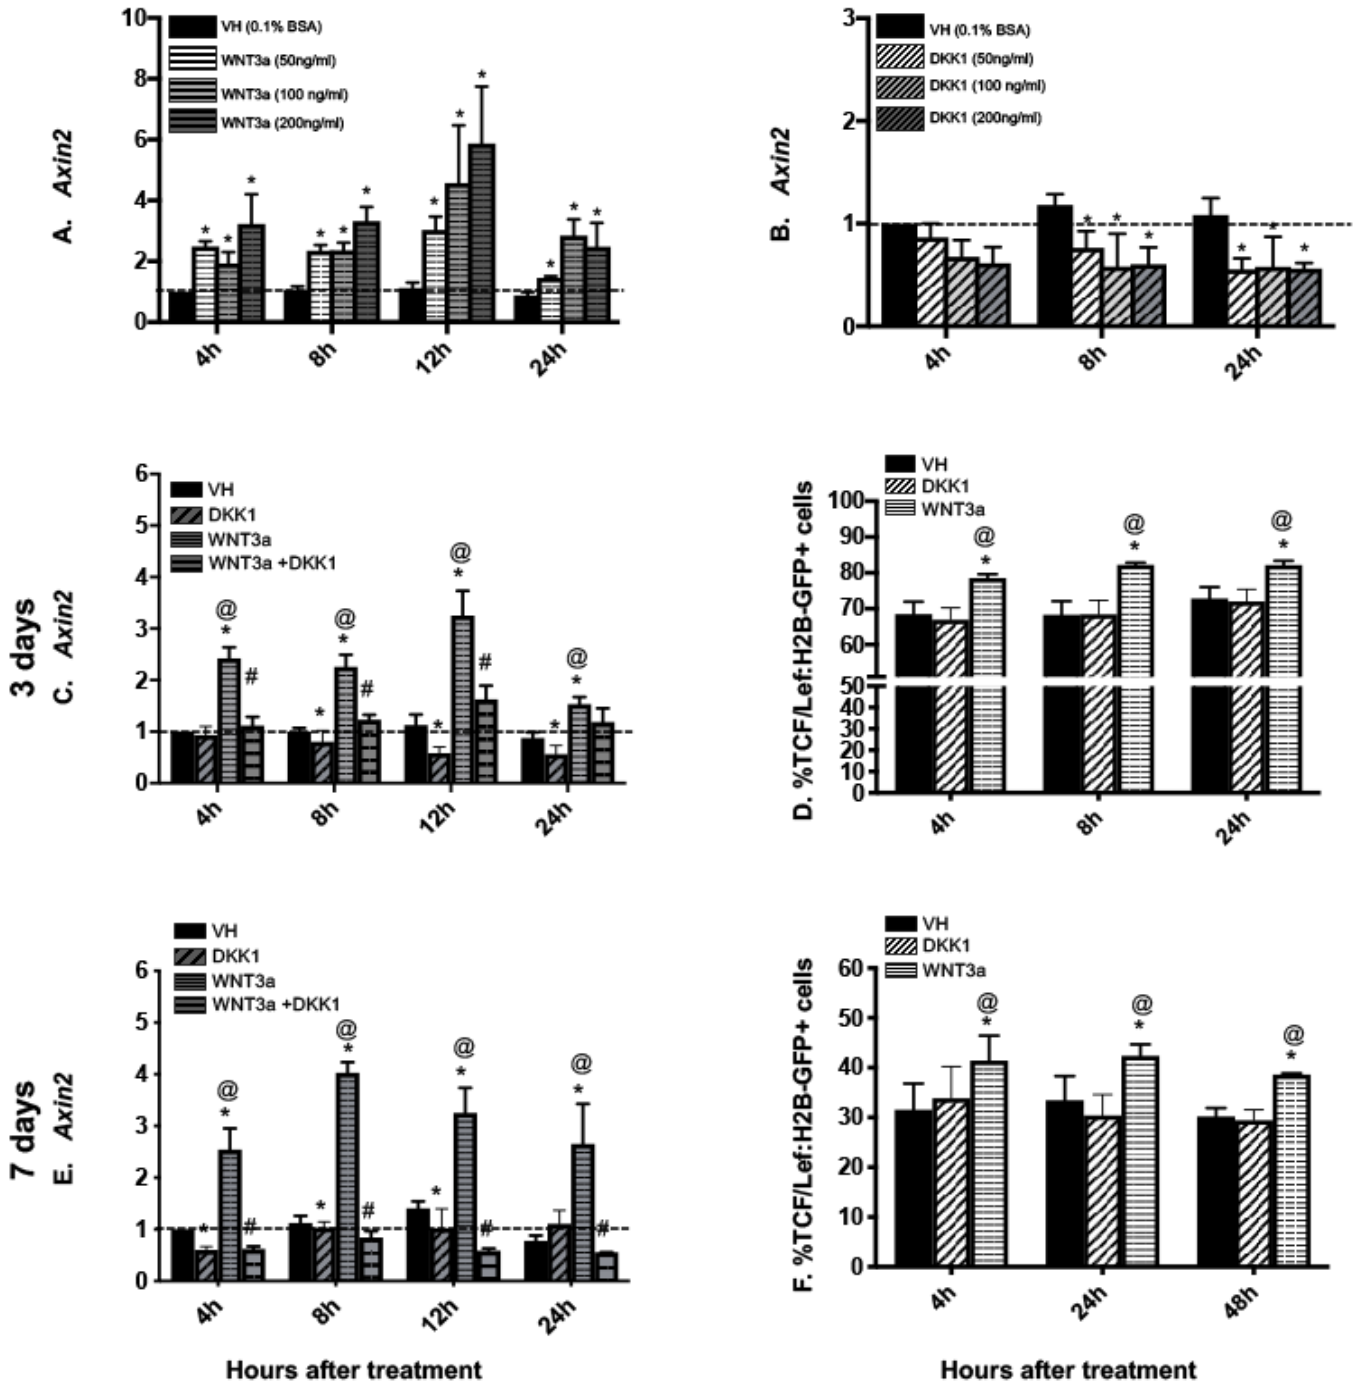

**Appendix Figure 3:**

**A and B: Dose-dependent effects of Wnt/ $\beta$ -catenin signaling on Wnt response in primary dental pulp cultures.** Bar graphs showing the dose-dependent changes in the expression of *Axin2* in cultures treated with Vehicle (VH, 0.1% BSA), (A) WNT3a (50, 100, and 200ng/ml), (B) DKK1 (50, 100, and 200 ng/ml) between 4-24 hours after treatment at various times at day 3.

**C-E: Effects of Wnt/ $\beta$ -catenin signaling on Wnt response in primary dental pulp cultures.**

C and D are bar graphs showing changes in the expression of *Axin2* (C) and the percentage of TCF/Lef: H2B-GFP<sup>+</sup> cells (D) between 4-24 hours in cultures with various treatments at day 3.

E and F are bar graphs showing changes in the expression of *Axin2* (E) and the percentage of TCF/Lef: H2B-GFP<sup>+</sup> cells (F) between 4-24 hours in cultures with various treatments at day 7.

The expression of *Axin2* was normalized to 4h of the VH-treated cultures, which is arbitrarily set to 1 and is indicated by the dashed line. Results in all graphs represent mean  $\pm$  SEM of at least 3 independent experiments; \*P  $\leq$  0.05 relative to VH at each time point; @P  $\leq$  0.05 relative to DKK1 at each time point; #P  $\leq$  0.05 relative to WNT3A at each time point.

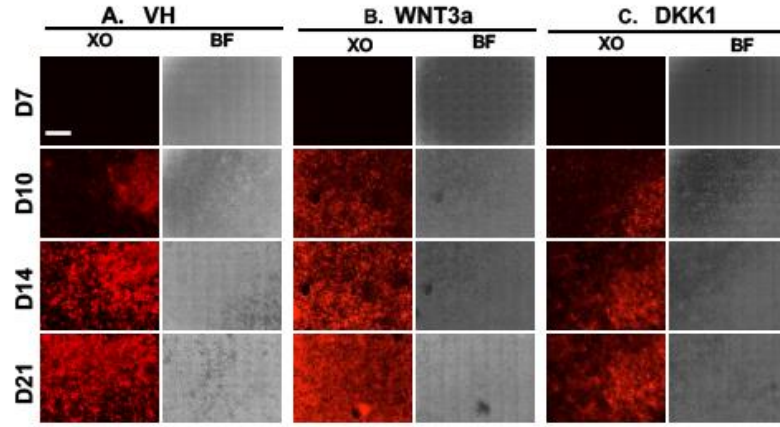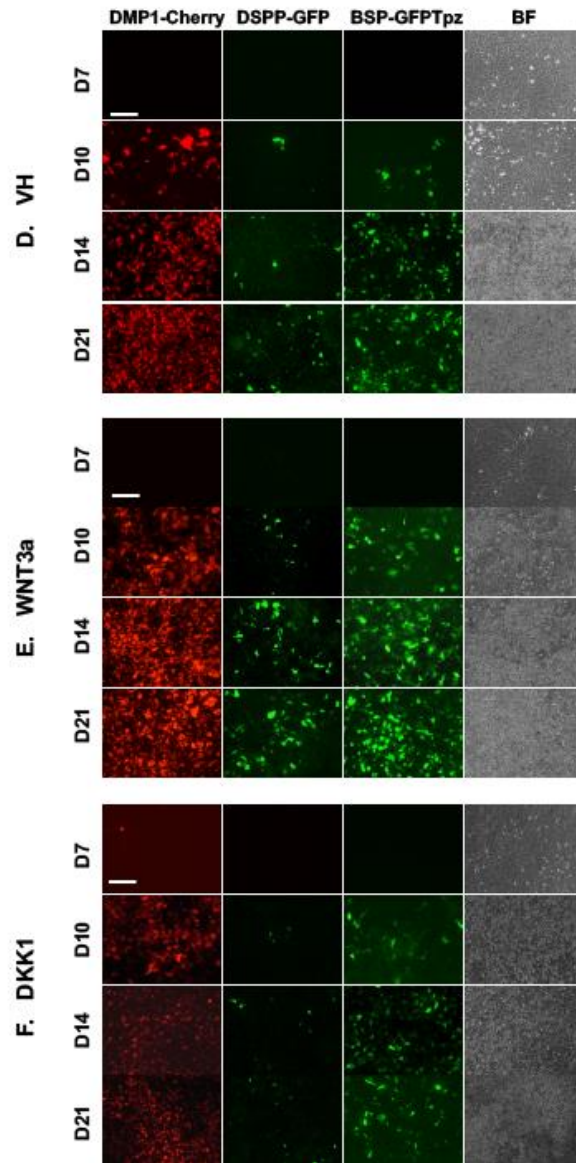

**Appendix Figure 4: Effects of continuous exposure to Wnt/ $\beta$ -catenin signaling modulation on mineralization and the tissue-and stage-specific GFP reporters.**

**(A-C)** Representative images of the same areas in cultures treated continuously between days 3-21 with **(A)** VH (0.1% BSA), **(B)** WNT3a (50ng/ml), and **(C)** DKK1 (50ng/ml) analyzed under brightfield (BF) and epifluorescent light using TRITC red filter for detection of XO staining. Continuous exposure to WNT3a increased mineralization, and DKK1 decreased mineralization. Scale bar = 2mm.

**(D-F)** Representative images of the cultures from DMP1-Cherry/DSPP-Cerulean and BSP-GFP<sup>tpz</sup> transgenic mice treated continuously from between days 3-21 with **(D)** VH, **(E)** WNT3a, and **(F)** DKK1 analyzed under brightfield (BF) and epifluorescent light for the detection of DMP1-Cherry, DSPP-GFP, and BSP-GFP<sup>tpz</sup>. Continuous exposure to WNT3a and LiCl increased DMP1-Cherry and DSPP-GFP expression, which were decreased in DKK1 treated cultures. WNT3a treatment also increased BSP-GFP<sup>tpz</sup> expression. Scale bar = 200  $\mu$ m

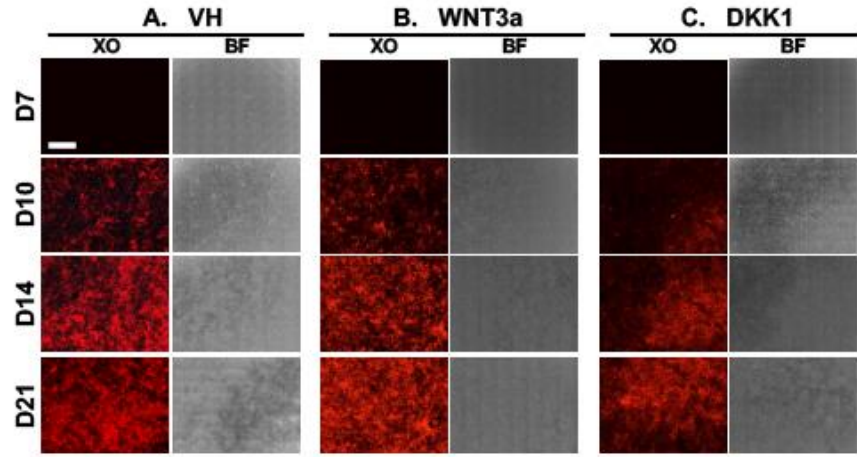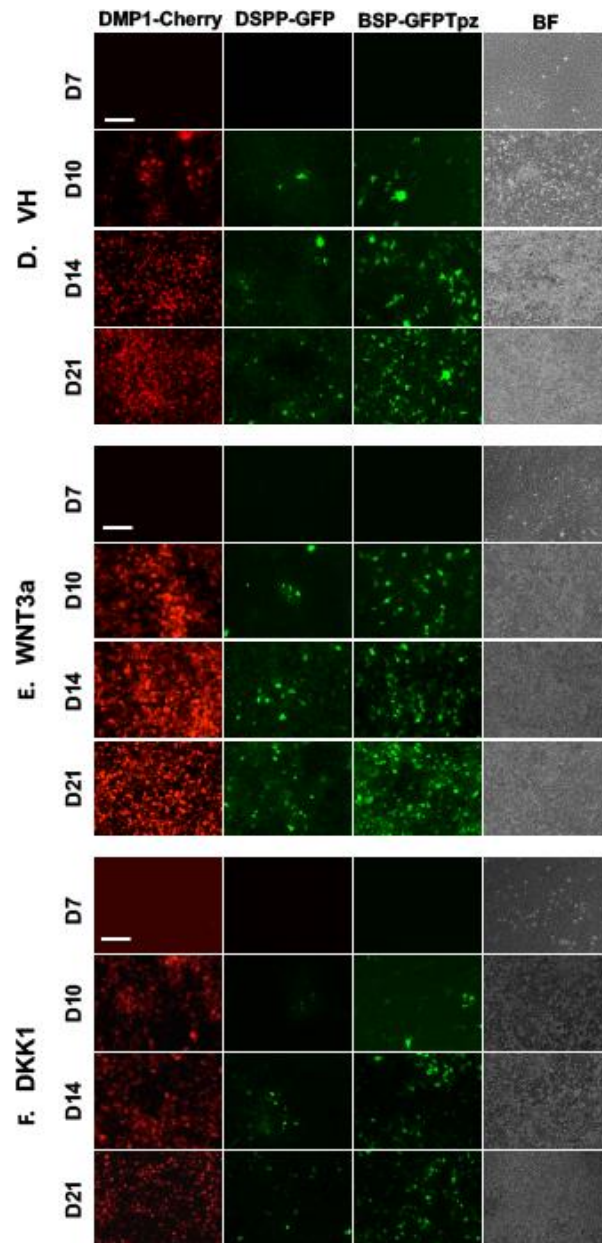



**Appendix Figure 5: Effects of late exposure to Wnt/ $\beta$ -catenin signaling modulation on mineralization and the tissue-and stage-specific GFP reporters.**

**(A-C)** Representative images of the same areas in cultures treated between days 7-21 with **(A)** VH (0.1% BSA), **(B)** WNT3a (50ng/ml), and **(C)** DKK1 (50ng/ml) analyzed under brightfield (BF) and epifluorescent light using TRITC red filter for detection of XO staining. Late exposure to WNT3a increased mineralization and DKK1 decreased mineralization, Scale bar = 2mm.

**(D-F)** Representative images of the cultures from DMP1-Cherry/DSPP-Cerulean and BSP-GFPtpz transgenic mice treated between days 7-21 with **(D)** VH, **(E)** WNT3a, and **(F)** DKK1, analyzed under brightfield (BF) and epifluorescent light for the detection of DMP1-Cherry, DSPP-GFP, and BSP-GFPtpz. Late exposure to WNT3a and LiCl increased DMP1-Cherry and DSPP-GFP expression, which were decreased in DKK1 treated cultures. WNT3a treatment also increased BSP-GFPtpz expression, which was decreased in DKK1-treated cultures. Scale bar = 200  $\mu$ m

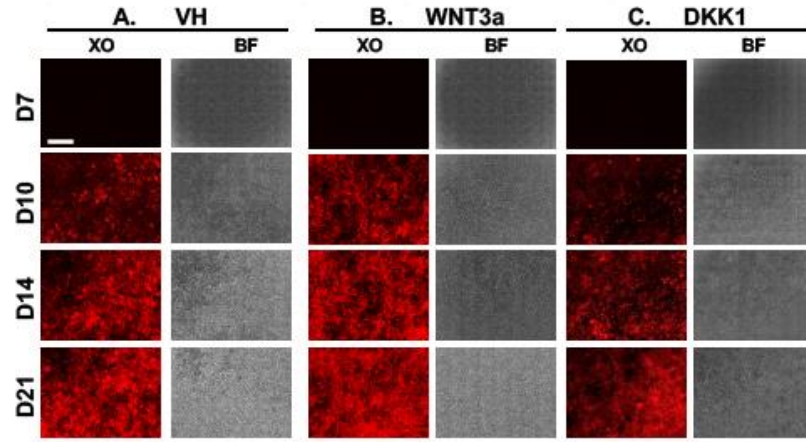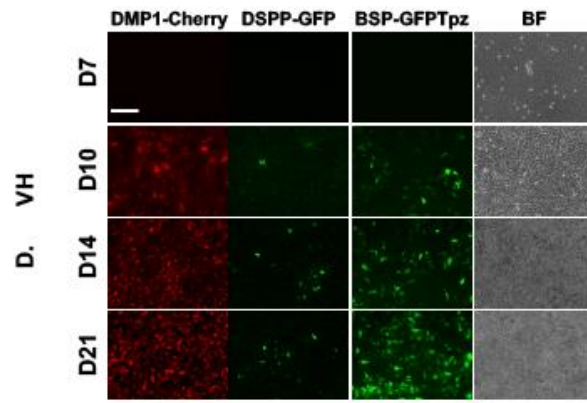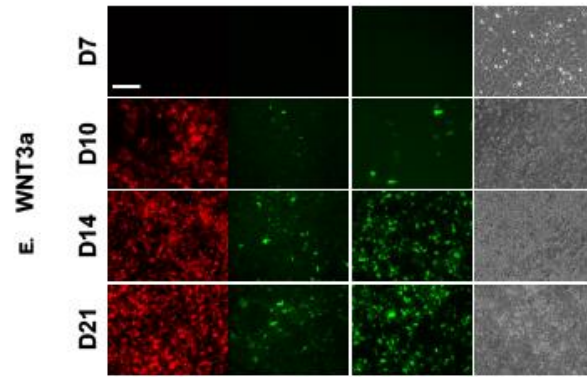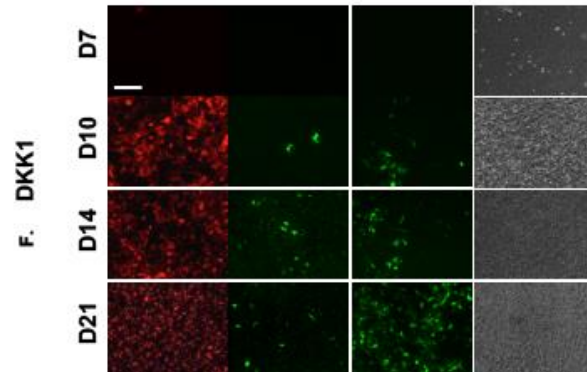

**Appendix Figure 6: Effects of early exposure to Wnt/ $\beta$ -catenin signaling modulation on mineralization and the tissue-and stage-specific GFP reporters.**

**(A-C)** Representative images of the same areas in cultures treated between days 3-7 with **(A)** VH (0.1% BSA), **(B)** WNT3a (50ng/ml), and **(C)** DKK1 (50ng/ml) analyzed under brightfield (BF) and epifluorescent light using TRITC red filter for detection of XO staining. Early exposure to WNT3a increased mineralization, and DKK1 decreased mineralization in pulp cultures. Scale bar = 2mm.

**(D-F)** Representative images of the cultures from DMP1-Cherry/DSPP-Cerulean and BSP-GFPtpz transgenic mice treated between days 3-7 with **(D)** VH, **(E)** WNT3a, and **(F)** DKK1, analyzed under brightfield (BF) and epifluorescent light for the detection of DMP1-Cherry, DSPP-GFP, and BSP-GFPtpz. Early exposure to WNT3a increased DMP1-Cherry, DSPP-GFP, and BSP-GFPtpz expression, which was decreased in DKK1 treated cultures. Scale bar = 200  $\mu$ m
